# Supplementary material for: Detection of a higher energy isomer of the CO–N2O van der Waals complex and determination of two of its intermolecular frequencies
Source: Royal Society of Chemistry journal article supplement (doi:10.1039/c6cp08001d), 2016-12-19
Supplement: c6cp08001d1.pdf [file c6cp08001d1.pdf]

Supplementary Material for:  
 Detection of a higher energy isomer of the CO-N<sub>2</sub>O van der Waals complex and  
 determination of two of its intermolecular frequencies  
 by A.J. Barclay, Clément Lauzin, S. Sheybani-Deloui,  
 K.H. Michaelian, and N. Moazzen-Ahmadi

Table A-1. Observed and calculated transitions in the C-O  
 stretching fundamental band of CO-N<sub>2</sub>O dimer (units of 1/cm).

```

*****
J'   Ka'  Kc'   J"   Ka"  Kc"  Observed  Calculated  Obs-Calc
*****
10   1    10   11   1    11   2138.9092  2138.9090  0.0003
 9   1    8    10   1    9    2138.9215  2138.9203  0.0011
 9   0    9    10   0    10   2139.0148  2139.0148 -0.0001
 1   1    1    2    2    0    2139.0433  2139.0431  0.0002
 8   1    7    9    1    8    2139.0620  2139.0612  0.0007
 7   0    7    8    1    8    2139.0998  2139.1005 -0.0007
 8   0    8    9    0    9    2139.1433  2139.1433  0.0000
 8   1    8    9    1    9    2139.1697  2139.1698 -0.0001
 7   1    6    8    1    7    2139.2039  2139.2036  0.0003
 7   2    5    8    2    6    2139.2202  2139.2197  0.0004
 7   2    6    8    2    7    2139.2465  2139.2463  0.0002
 7   0    7    8    0    8    2139.2733  2139.2733 -0.0000
 7   1    7    8    1    8    2139.3010  2139.3013 -0.0003
 5   0    5    6    1    6    2139.3066  2139.3065  0.0001
 6   1    5    7    1    6    2139.3474  2139.3472  0.0002
 2   1    1    2    2    0    2139.3545  2139.3540  0.0005
 6   2    4    7    2    5    2139.3668  2139.3667  0.0001
 6   2    5    7    2    6    2139.3850  2139.3849  0.0001
 4   1    3    4    2    2    2139.3958  2139.3957  0.0001
 6   0    6    7    0    7    2139.4052  2139.4053 -0.0001
 6   1    5    6    2    4    2139.4487  2139.4488 -0.0001
 5   1    4    6    1    5    2139.4919  2139.4919  0.0000
 5   0    5    6    0    6    2139.5392  2139.5393 -0.0001
 4   1    3    5    1    4    2139.6376  2139.6376 -0.0000
 2   0    2    3    1    3    2139.6421  2139.6420  0.0002
 4   2    3    5    2    4    2139.6643  2139.6644 -0.0001
 4   0    4    5    0    5    2139.6754  2139.6753  0.0000
 4   1    4    5    1    5    2139.7000  2139.7000 -0.0000
 1   0    1    2    1    2    2139.7651  2139.7649  0.0002
 3   1    2    4    1    3    2139.7842  2139.7842  0.0000
 3   2    1    4    2    2    2139.8015  2139.8016 -0.0001
 3   2    2    4    2    3    2139.8049  2139.8050 -0.0002
 3   0    3    4    0    4    2139.8133  2139.8132  0.0001
 7   0    7    7    1    6    2139.8290  2139.8288  0.0002
 3   1    3    4    1    4    2139.8344  2139.8343  0.0001
 6   0    6    6    1    5    2139.8850  2139.8851 -0.0001
 0   0    0    1    1    1    2139.8945  2139.8944  0.0002
 2   1    1    3    1    2    2139.9314  2139.9314 -0.0001
 2   0    2    3    0    3    2139.9528  2139.9528  0.0001
 4   1    4    5    0    5    2139.9620  2139.9618  0.0002
 2   1    2    3    1    3    2139.9693  2139.9692  0.0001
 3   0    3    3    1    2    2139.9929  2139.9928  0.0001
 2   0    2    2    1    1    2140.0122  2140.0121  0.0002
 1   0    1    1    1    0    2140.0246  2140.0245  0.0002
 1   1    0    2    1    1    2140.0794  2140.0793  0.0000
 1   0    1    2    0    2    2140.0937  2140.0936  0.0001
 1   1    1    2    1    2    2140.1046  2140.1046  0.0001
 3   1    3    4    0    4    2140.1223  2140.1224 -0.0001
 5   1    5    5    1    4    2140.1901  2140.1903 -0.0002
 0   0    0    1    0    1    2140.2355  2140.2355  0.0000
 4   1    4    4    1    3    2140.2521  2140.2523 -0.0002
 2   1    2    3    0    3    2140.2798  2140.2800 -0.0002
 3   1    3    3    1    2    2140.3019  2140.3020 -0.0001
 2   1    2    2    1    1    2140.3392  2140.3393 -0.0001
    
```

|    |   |    |    |   |    |           |           |         |
|----|---|----|----|---|----|-----------|-----------|---------|
| 1  | 1 | 0  | 1  | 1 | 1  | 2140.3895 | 2140.3895 | -0.0001 |
| 6  | 2 | 4  | 6  | 2 | 5  | 2140.4014 | 2140.4023 | -0.0009 |
| 2  | 1 | 1  | 2  | 1 | 2  | 2140.4155 | 2140.4155 | 0.0000  |
| 3  | 1 | 2  | 3  | 1 | 3  | 2140.4544 | 2140.4544 | -0.0000 |
| 3  | 0 | 3  | 2  | 1 | 2  | 2140.4770 | 2140.4769 | 0.0001  |
| 4  | 1 | 3  | 4  | 1 | 4  | 2140.5063 | 2140.5063 | 0.0000  |
| 1  | 0 | 1  | 0  | 0 | 0  | 2140.5207 | 2140.5207 | -0.0000 |
| 5  | 1 | 4  | 5  | 1 | 5  | 2140.5706 | 2140.5710 | -0.0004 |
| 4  | 0 | 4  | 3  | 1 | 3  | 2140.6361 | 2140.6362 | -0.0000 |
| 2  | 1 | 2  | 1  | 1 | 1  | 2140.6493 | 2140.6495 | -0.0002 |
| 2  | 0 | 2  | 1  | 0 | 1  | 2140.6633 | 2140.6634 | -0.0001 |
| 2  | 1 | 1  | 1  | 1 | 0  | 2140.6750 | 2140.6751 | -0.0001 |
| 1  | 1 | 0  | 1  | 0 | 1  | 2140.7303 | 2140.7306 | -0.0003 |
| 2  | 1 | 1  | 2  | 0 | 2  | 2140.7439 | 2140.7442 | -0.0003 |
| 3  | 1 | 2  | 3  | 0 | 3  | 2140.7650 | 2140.7652 | -0.0002 |
| 3  | 1 | 3  | 2  | 1 | 2  | 2140.7861 | 2140.7861 | -0.0000 |
| 4  | 1 | 3  | 4  | 0 | 4  | 2140.7944 | 2140.7944 | -0.0000 |
| 3  | 0 | 3  | 2  | 0 | 2  | 2140.8056 | 2140.8056 | -0.0000 |
| 3  | 1 | 2  | 2  | 1 | 1  | 2140.8246 | 2140.8245 | 0.0001  |
| 5  | 1 | 4  | 5  | 0 | 5  | 2140.8327 | 2140.8327 | -0.0001 |
| 1  | 1 | 1  | 0  | 0 | 0  | 2140.8603 | 2140.8604 | -0.0001 |
| 6  | 1 | 5  | 6  | 0 | 6  | 2140.8812 | 2140.8812 | -0.0001 |
| 4  | 1 | 4  | 3  | 1 | 3  | 2140.9226 | 2140.9226 | -0.0000 |
| 4  | 0 | 4  | 3  | 0 | 3  | 2140.9471 | 2140.9470 | 0.0001  |
| 6  | 0 | 6  | 5  | 1 | 5  | 2140.9644 | 2140.9642 | 0.0003  |
| 4  | 1 | 3  | 3  | 1 | 2  | 2140.9740 | 2140.9740 | 0.0000  |
| 2  | 1 | 2  | 1  | 0 | 1  | 2140.9906 | 2140.9906 | -0.0000 |
| 5  | 1 | 5  | 4  | 1 | 4  | 2141.0589 | 2141.0590 | -0.0001 |
| 5  | 0 | 5  | 4  | 0 | 4  | 2141.0873 | 2141.0872 | 0.0001  |
| 5  | 2 | 3  | 4  | 2 | 2  | 2141.0943 | 2141.0943 | 0.0001  |
| 3  | 1 | 3  | 2  | 0 | 2  | 2141.1146 | 2141.1148 | -0.0002 |
| 5  | 1 | 4  | 4  | 1 | 3  | 2141.1233 | 2141.1233 | 0.0000  |
| 7  | 0 | 7  | 6  | 1 | 6  | 2141.1299 | 2141.1301 | -0.0002 |
| 6  | 1 | 6  | 5  | 1 | 5  | 2141.1950 | 2141.1951 | -0.0001 |
| 6  | 0 | 6  | 5  | 0 | 5  | 2141.2258 | 2141.2259 | -0.0001 |
| 6  | 2 | 4  | 5  | 2 | 3  | 2141.2425 | 2141.2424 | 0.0001  |
| 6  | 1 | 5  | 5  | 1 | 4  | 2141.2722 | 2141.2723 | -0.0001 |
| 6  | 2 | 4  | 6  | 1 | 5  | 2141.3128 | 2141.3126 | 0.0001  |
| 7  | 1 | 7  | 6  | 1 | 6  | 2141.3309 | 2141.3308 | 0.0001  |
| 5  | 2 | 3  | 5  | 1 | 4  | 2141.3362 | 2141.3362 | 0.0000  |
| 5  | 1 | 5  | 4  | 0 | 4  | 2141.3471 | 2141.3471 | 0.0000  |
| 7  | 0 | 7  | 6  | 0 | 6  | 2141.3628 | 2141.3629 | -0.0001 |
| 7  | 2 | 5  | 6  | 2 | 4  | 2141.3924 | 2141.3922 | 0.0002  |
| 2  | 2 | 0  | 2  | 1 | 1  | 2141.3966 | 2141.3967 | -0.0001 |
| 8  | 1 | 8  | 7  | 1 | 7  | 2141.4663 | 2141.4662 | 0.0001  |
| 4  | 2 | 3  | 4  | 1 | 4  | 2141.4807 | 2141.4806 | 0.0002  |
| 8  | 0 | 8  | 7  | 0 | 7  | 2141.4980 | 2141.4981 | -0.0001 |
| 8  | 2 | 6  | 7  | 2 | 5  | 2141.5436 | 2141.5436 | 0.0000  |
| 6  | 2 | 5  | 6  | 1 | 6  | 2141.5543 | 2141.5538 | 0.0005  |
| 8  | 1 | 7  | 7  | 1 | 6  | 2141.5679 | 2141.5687 | -0.0009 |
| 9  | 1 | 9  | 8  | 1 | 8  | 2141.6012 | 2141.6012 | 0.0000  |
| 9  | 0 | 9  | 8  | 0 | 8  | 2141.6315 | 2141.6316 | -0.0001 |
| 8  | 1 | 8  | 7  | 0 | 7  | 2141.6690 | 2141.6689 | 0.0001  |
| 2  | 2 | 1  | 1  | 1 | 0  | 2141.6947 | 2141.6939 | 0.0008  |
| 9  | 1 | 8  | 8  | 1 | 7  | 2141.7153 | 2141.7157 | -0.0004 |
| 10 | 1 | 10 | 9  | 1 | 9  | 2141.7359 | 2141.7356 | 0.0003  |
| 10 | 0 | 10 | 9  | 0 | 9  | 2141.7634 | 2141.7635 | -0.0001 |
| 3  | 2 | 2  | 2  | 1 | 1  | 2141.8240 | 2141.8242 | -0.0002 |
| 10 | 2 | 8  | 9  | 2 | 7  | 2141.8495 | 2141.8502 | -0.0007 |
| 11 | 1 | 11 | 10 | 1 | 10 | 2141.8695 | 2141.8695 | -0.0000 |
| 11 | 0 | 11 | 10 | 0 | 10 | 2141.8942 | 2141.8943 | -0.0001 |
| 4  | 2 | 3  | 3  | 1 | 2  | 2141.9480 | 2141.9482 | -0.0002 |
| 12 | 0 | 12 | 11 | 0 | 11 | 2142.0242 | 2142.0242 | 0.0000  |
| 4  | 2 | 2  | 3  | 1 | 3  | 2142.0294 | 2142.0295 | -0.0001 |
| 5  | 2 | 4  | 4  | 1 | 3  | 2142.0659 | 2142.0660 | -0.0001 |
| 5  | 3 | 2  | 5  | 2 | 3  | 2142.0955 | 2142.0957 | -0.0002 |
| 6  | 2 | 5  | 5  | 1 | 4  | 2142.1779 | 2142.1777 | 0.0002  |
| 5  | 2 | 3  | 4  | 1 | 4  | 2142.2049 | 2142.2049 | 0.0000  |

```

6      2      4      5      1      5      2142.3922      2142.3917      0.0005
*****

```

Table A-2. Observed and calculated transitions in the CO-rock/disrotatory combination band of CO-N2O dimer (units of 1/cm).

```

*****
J'   Ka'  Kc'   J''  Ka'' Kc''  Observed  Calculated  Obs-Calc
*****
4     1    4     5     2    3     2152.9952  2152.9954  -0.0002
4     1    3     5     2    4     2153.1317  2153.1321  -0.0004
3     1    3     4     2    2     2153.1700  2153.1697   0.0002
2     1    2     3     2    1     2153.3343  2153.3344  -0.0000
2     1    1     3     2    2     2153.3736  2153.3735   0.0001
8     0    8     9     1    9     2153.4756  2153.4761  -0.0005
1     1    1     2     2    0     2153.4905  2153.4907  -0.0002
1     1    0     2     2    1     2153.5036  2153.5035   0.0001
7     0    7     8     1    8     2153.5840  2153.5836   0.0004
5     1    5     5     2    4     2153.6858  2153.6859  -0.0002
6     0    6     7     1    7     2153.6907  2153.6908  -0.0001
3     1    3     3     2    2     2153.7440  2153.7439   0.0001
8     1    8     9     0    9     2153.7516  2153.7513   0.0004
2     1    2     2     2    1     2153.7629  2153.7631  -0.0002
5     0    5     6     1    6     2153.7992  2153.7989   0.0003
3     1    2     3     2    1     2153.8168  2153.8170  -0.0002
4     1    3     4     2    2     2153.8376  2153.8377  -0.0001
6     1    5     6     2    4     2153.8848  2153.8843   0.0005
6     0    6     7     0    7     2153.8934  2153.8935  -0.0001
4     0    4     5     1    5     2153.9093  2153.9094  -0.0001
8     1    7     8     2    6     2153.9247  2153.9246   0.0002
3     0    3     4     1    4     2154.0234  2154.0234  -0.0000
2     0    2     3     1    3     2154.1417  2154.1420  -0.0003
4     0    4     5     0    5     2154.1709  2154.1711  -0.0002
3     1    2     4     1    3     2154.2288  2154.2285   0.0003
5     1    5     6     0    6     2154.2430  2154.2424   0.0006
1     0    1     2     1    2     2154.2661  2154.2661  -0.0000
3     1    3     4     1    4     2154.2806  2154.2803   0.0003
7     0    7     7     1    6     2154.3118  2154.3119  -0.0001
2     1    1     3     1    2     2154.3774  2154.3776  -0.0001
0     0    0     1     1    1     2154.3959  2154.3961  -0.0002
4     1    4     5     0    5     2154.4068  2154.4065   0.0003
2     1    2     3     1    3     2154.4160  2154.4161  -0.0001
5     0    5     5     1    4     2154.4230  2154.4228   0.0002
2     0    2     3     0    3     2154.4527  2154.4528  -0.0001
4     0    4     4     1    3     2154.4618  2154.4617   0.0001
3     0    3     3     1    2     2154.4913  2154.4911   0.0002
2     0    2     2     1    1     2154.5121  2154.5121  -0.0000
1     0    1     1     1    0     2154.5257  2154.5256   0.0001
1     1    1     2     1    2     2154.5520  2154.5522  -0.0001
3     1    3     4     0    4     2154.5684  2154.5684  -0.0000
1     1    1     1     1    0     2154.8119  2154.8117   0.0001
1     1    1     1     1    0     2154.8119  2154.8117   0.0002
2     0    2     1     1    1     2154.8227  2154.8223   0.0004
1     1    0     1     1    1     2154.8367  2154.8368  -0.0002
1     1    1     2     0    2     2154.8806  2154.8809  -0.0002
3     0    3     2     1    2     2154.9753  2154.9751   0.0002
1     0    1     0     0    0     2155.0219  2155.0219  -0.0000
2     1    2     1     1    1     2155.0964  2155.0964  -0.0001
2     1    1     1     1    0     2155.1209  2155.1212  -0.0003
4     0    4     3     1    3     2155.1314  2155.1319  -0.0006
2     0    2     1     0    1     2155.1631  2155.1634  -0.0003
1     1    0     1     0    1     2155.1776  2155.1779  -0.0004
2     1    1     2     0    2     2155.1900  2155.1903  -0.0003
3     1    2     3     0    3     2155.2093  2155.2096  -0.0003
4     1    3     4     0    4     2155.2362  2155.2364  -0.0002

```

|   |   |   |   |   |   |           |           |         |
|---|---|---|---|---|---|-----------|-----------|---------|
| 5 | 1 | 4 | 5 | 0 | 5 | 2155.2712 | 2155.2718 | -0.0006 |
| 5 | 0 | 5 | 4 | 1 | 4 | 2155.2915 | 2155.2915 | 0.0000  |
| 3 | 0 | 3 | 2 | 0 | 2 | 2155.3039 | 2155.3039 | 0.0000  |
| 1 | 1 | 1 | 0 | 0 | 0 | 2155.3074 | 2155.3080 | -0.0005 |
| 6 | 1 | 5 | 6 | 0 | 6 | 2155.3167 | 2155.3167 | -0.0001 |
| 4 | 1 | 4 | 3 | 1 | 3 | 2155.3674 | 2155.3673 | 0.0000  |
| 7 | 1 | 6 | 7 | 0 | 7 | 2155.3725 | 2155.3725 | 0.0001  |
| 5 | 2 | 3 | 4 | 2 | 2 | 2155.3846 | 2155.3845 | 0.0001  |
| 4 | 1 | 3 | 3 | 1 | 2 | 2155.4156 | 2155.4160 | -0.0004 |
| 2 | 1 | 2 | 1 | 0 | 1 | 2155.4375 | 2155.4375 | -0.0000 |
| 4 | 0 | 4 | 3 | 0 | 3 | 2155.4428 | 2155.4427 | 0.0001  |
| 6 | 0 | 6 | 5 | 1 | 5 | 2155.4523 | 2155.4524 | -0.0001 |
| 5 | 1 | 5 | 4 | 1 | 4 | 2155.5026 | 2155.5021 | 0.0005  |
| 3 | 1 | 3 | 2 | 0 | 2 | 2155.5612 | 2155.5608 | 0.0004  |
| 5 | 0 | 5 | 4 | 0 | 4 | 2155.5798 | 2155.5796 | 0.0002  |
| 6 | 2 | 4 | 6 | 1 | 5 | 2155.6036 | 2155.6033 | 0.0003  |
| 7 | 0 | 7 | 6 | 1 | 6 | 2155.6125 | 2155.6131 | -0.0006 |
| 5 | 2 | 3 | 5 | 1 | 4 | 2155.6267 | 2155.6264 | 0.0002  |
| 6 | 1 | 6 | 5 | 1 | 5 | 2155.6368 | 2155.6364 | 0.0004  |
| 4 | 2 | 2 | 4 | 1 | 3 | 2155.6495 | 2155.6495 | -0.0001 |
| 3 | 2 | 1 | 3 | 1 | 2 | 2155.6704 | 2155.6705 | -0.0001 |
| 4 | 1 | 4 | 3 | 0 | 3 | 2155.6786 | 2155.6781 | 0.0004  |
| 6 | 1 | 5 | 5 | 1 | 4 | 2155.7079 | 2155.7078 | 0.0000  |
| 6 | 0 | 6 | 5 | 0 | 5 | 2155.7149 | 2155.7141 | 0.0008  |
| 2 | 2 | 1 | 2 | 1 | 2 | 2155.7252 | 2155.7254 | -0.0002 |
| 3 | 2 | 2 | 3 | 1 | 3 | 2155.7444 | 2155.7445 | -0.0001 |
| 4 | 2 | 3 | 4 | 1 | 4 | 2155.7705 | 2155.7701 | 0.0004  |
| 5 | 1 | 5 | 4 | 0 | 4 | 2155.7906 | 2155.7902 | 0.0004  |
| 5 | 2 | 4 | 5 | 1 | 5 | 2155.8024 | 2155.8024 | 0.0000  |
| 6 | 2 | 5 | 6 | 1 | 6 | 2155.8415 | 2155.8414 | 0.0001  |
| 7 | 0 | 7 | 6 | 0 | 6 | 2155.8461 | 2155.8459 | 0.0002  |
| 7 | 1 | 6 | 6 | 1 | 5 | 2155.8519 | 2155.8523 | -0.0004 |
| 7 | 2 | 6 | 7 | 1 | 7 | 2155.8870 | 2155.8871 | -0.0001 |
| 6 | 1 | 6 | 5 | 0 | 5 | 2155.8984 | 2155.8981 | 0.0003  |
| 9 | 0 | 9 | 8 | 1 | 8 | 2155.9292 | 2155.9294 | -0.0002 |
| 8 | 0 | 8 | 7 | 0 | 7 | 2155.9750 | 2155.9752 | -0.0001 |
| 2 | 2 | 1 | 1 | 1 | 0 | 2155.9849 | 2155.9849 | 0.0000  |
| 2 | 2 | 0 | 1 | 1 | 1 | 2155.9980 | 2155.9980 | -0.0000 |
| 7 | 1 | 7 | 6 | 0 | 6 | 2156.0033 | 2156.0029 | 0.0004  |
| 8 | 1 | 8 | 7 | 0 | 7 | 2156.1057 | 2156.1061 | -0.0003 |
| 3 | 2 | 2 | 2 | 1 | 1 | 2156.1147 | 2156.1146 | 0.0001  |
| 7 | 3 | 4 | 7 | 2 | 5 | 2156.1293 | 2156.1295 | -0.0002 |
| 3 | 2 | 1 | 2 | 1 | 2 | 2156.1545 | 2156.1546 | -0.0001 |
| 9 | 1 | 9 | 8 | 0 | 8 | 2156.2080 | 2156.2089 | -0.0009 |
| 4 | 2 | 3 | 3 | 1 | 2 | 2156.2378 | 2156.2378 | -0.0000 |
| 4 | 2 | 2 | 3 | 1 | 3 | 2156.3199 | 2156.3198 | 0.0001  |
| 5 | 2 | 4 | 4 | 1 | 3 | 2156.3547 | 2156.3547 | 0.0000  |
| 6 | 2 | 5 | 5 | 1 | 4 | 2156.4655 | 2156.4652 | 0.0003  |
| 5 | 2 | 3 | 4 | 1 | 4 | 2156.4954 | 2156.4951 | 0.0003  |
| 8 | 2 | 7 | 7 | 1 | 6 | 2156.6679 | 2156.6681 | -0.0002 |
| 6 | 2 | 4 | 5 | 1 | 5 | 2156.6831 | 2156.6824 | 0.0007  |
| 5 | 3 | 3 | 4 | 2 | 2 | 2156.8623 | 2156.8626 | -0.0003 |
| 5 | 3 | 2 | 4 | 2 | 3 | 2156.8677 | 2156.8680 | -0.0002 |

Table A-3. Observed and calculated transitions in the torsional combination band of CO-N<sub>2</sub>O dimer (units of 1/cm).

| J' | Ka' | Kc' | J'' | Ka'' | Kc'' | Observed  | Calculated | Obs-Calc |
|----|-----|-----|-----|------|------|-----------|------------|----------|
| 5  | 1   | 4   | 6   | 2    | 4    | 2159.8590 | 2159.8610  | -0.0020  |
| 3  | 1   | 3   | 4   | 2    | 3    | 2160.0175 | 2160.0180  | -0.0006  |
| 3  | 0   | 2   | 4   | 2    | 2    | 2160.0863 | 2160.0873  | -0.0010  |
| 6  | 1   | 6   | 7   | 1    | 6    | 2160.1142 | 2160.1141  | 0.0001   |

|   |   |   |   |   |   |           |           |         |
|---|---|---|---|---|---|-----------|-----------|---------|
| 2 | 1 | 1 | 3 | 2 | 1 | 2160.2078 | 2160.2076 | 0.0002  |
| 1 | 0 | 0 | 2 | 2 | 0 | 2160.3348 | 2160.3344 | 0.0005  |
| 4 | 1 | 4 | 5 | 1 | 4 | 2160.4621 | 2160.4631 | -0.0010 |
| 5 | 1 | 5 | 5 | 2 | 3 | 2160.5400 | 2160.5390 | 0.0010  |
| 4 | 1 | 4 | 4 | 2 | 2 | 2160.5644 | 2160.5658 | -0.0015 |
| 3 | 0 | 3 | 3 | 2 | 1 | 2160.5850 | 2160.5853 | -0.0003 |
| 3 | 1 | 3 | 4 | 1 | 3 | 2160.6293 | 2160.6293 | -0.0000 |
| 2 | 1 | 1 | 2 | 2 | 1 | 2160.6362 | 2160.6363 | -0.0001 |
| 3 | 1 | 2 | 3 | 2 | 2 | 2160.6612 | 2160.6615 | -0.0003 |
| 5 | 0 | 4 | 5 | 2 | 4 | 2160.7378 | 2160.7370 | 0.0008  |
| 2 | 0 | 2 | 3 | 1 | 2 | 2160.7905 | 2160.7906 | -0.0001 |
| 1 | 0 | 1 | 2 | 1 | 1 | 2160.9478 | 2160.9476 | 0.0003  |
| 0 | 0 | 0 | 1 | 1 | 0 | 2161.1008 | 2161.1005 | 0.0003  |
| 6 | 1 | 5 | 7 | 0 | 7 | 2161.2179 | 2161.2179 | 0.0000  |
| 1 | 1 | 1 | 1 | 1 | 1 | 2161.2580 | 2161.2578 | 0.0001  |
| 4 | 0 | 3 | 3 | 2 | 1 | 2161.2629 | 2161.2624 | 0.0005  |
| 2 | 1 | 2 | 2 | 1 | 2 | 2161.2749 | 2161.2747 | 0.0002  |
| 5 | 0 | 4 | 6 | 0 | 6 | 2161.2943 | 2161.2934 | 0.0008  |
| 3 | 0 | 3 | 3 | 1 | 3 | 2161.2996 | 2161.2995 | 0.0001  |
| 4 | 0 | 4 | 4 | 1 | 4 | 2161.3312 | 2161.3318 | -0.0006 |
| 5 | 0 | 5 | 5 | 1 | 5 | 2161.3723 | 2161.3707 | 0.0015  |
| 7 | 1 | 7 | 7 | 1 | 7 | 2161.4643 | 2161.4647 | -0.0004 |
| 3 | 0 | 2 | 4 | 0 | 4 | 2161.4853 | 2161.4860 | -0.0006 |
| 2 | 1 | 2 | 1 | 1 | 0 | 2161.5344 | 2161.5343 | 0.0001  |
| 2 | 0 | 1 | 3 | 0 | 3 | 2161.5995 | 2161.6001 | -0.0006 |
| 3 | 1 | 3 | 2 | 1 | 1 | 2161.6695 | 2161.6696 | -0.0002 |
| 1 | 0 | 0 | 2 | 0 | 2 | 2161.7244 | 2161.7245 | -0.0001 |
| 4 | 1 | 4 | 3 | 1 | 2 | 2161.7989 | 2161.7995 | -0.0006 |
| 9 | 1 | 9 | 9 | 0 | 9 | 2161.9067 | 2161.9081 | -0.0014 |
| 8 | 1 | 8 | 8 | 0 | 8 | 2161.9130 | 2161.9132 | -0.0002 |
| 7 | 1 | 7 | 7 | 0 | 7 | 2161.9238 | 2161.9228 | 0.0009  |
| 6 | 1 | 6 | 6 | 0 | 6 | 2161.9365 | 2161.9356 | 0.0009  |
| 5 | 0 | 5 | 5 | 0 | 5 | 2161.9513 | 2161.9500 | 0.0013  |
| 2 | 1 | 2 | 2 | 0 | 2 | 2161.9891 | 2161.9889 | 0.0002  |
| 1 | 3 | 1 | 1 | 0 | 1 | 2161.9964 | 2161.9967 | -0.0003 |
| 6 | 1 | 6 | 5 | 1 | 4 | 2162.0397 | 2162.0392 | 0.0005  |
| 1 | 2 | 0 | 0 | 0 | 0 | 2162.1516 | 2162.1516 | 0.0000  |
| 7 | 2 | 6 | 7 | 1 | 6 | 2162.7426 | 2162.7428 | -0.0002 |
| 6 | 2 | 5 | 6 | 1 | 5 | 2162.7705 | 2162.7707 | -0.0001 |
| 4 | 1 | 3 | 4 | 1 | 3 | 2162.8166 | 2162.8166 | 0.0000  |
| 5 | 2 | 4 | 4 | 0 | 4 | 2162.8416 | 2162.8413 | 0.0003  |
| 2 | 2 | 0 | 2 | 1 | 2 | 2162.8836 | 2162.8854 | -0.0017 |
| 3 | 2 | 1 | 3 | 1 | 3 | 2162.9132 | 2162.9113 | 0.0019  |
| 4 | 2 | 2 | 4 | 1 | 4 | 2162.9475 | 2162.9475 | -0.0000 |
| 5 | 1 | 3 | 5 | 1 | 5 | 2162.9956 | 2162.9952 | 0.0004  |
| 6 | 2 | 5 | 5 | 0 | 5 | 2163.0382 | 2163.0384 | -0.0003 |
| 2 | 2 | 0 | 1 | 1 | 0 | 2163.1435 | 2163.1449 | -0.0014 |
| 2 | 2 | 1 | 1 | 1 | 1 | 2163.1559 | 2163.1573 | -0.0015 |
| 3 | 2 | 1 | 2 | 1 | 1 | 2163.2834 | 2163.2814 | 0.0020  |
| 3 | 2 | 2 | 2 | 1 | 2 | 2163.3200 | 2163.3180 | 0.0020  |
| 4 | 2 | 3 | 3 | 1 | 3 | 2163.4875 | 2163.4869 | 0.0006  |
| 5 | 2 | 3 | 4 | 1 | 3 | 2163.5468 | 2163.5475 | -0.0006 |
| 5 | 2 | 4 | 4 | 1 | 4 | 2163.6645 | 2163.6641 | 0.0004  |
| 6 | 1 | 4 | 5 | 1 | 4 | 2163.6795 | 2163.6798 | -0.0003 |
| 5 | 2 | 2 | 5 | 2 | 4 | 2163.8396 | 2163.8405 | -0.0009 |
| 6 | 2 | 5 | 5 | 1 | 5 | 2163.8507 | 2163.8498 | 0.0009  |

\*\*\*\*\*

Table A-4. Observed and calculated transitions in the torsional combination band of CO-N2O dimer (units of 1/cm).

| J' | Ka' | Kc' | J'' | Ka'' | Kc'' | Observed  | Calculated | Obs-Calc |
|----|-----|-----|-----|------|------|-----------|------------|----------|
| 4  | 1   | 4   | 5   | 2    | 3    | 2223.4891 | 2223.4893  | -0.0001  |

|   |   |   |   |   |   |           |           |         |
|---|---|---|---|---|---|-----------|-----------|---------|
| 5 | 1 | 4 | 6 | 2 | 5 | 2223.5174 | 2223.5180 | -0.0006 |
| 9 | 2 | 8 | 9 | 3 | 7 | 2223.5412 | 2223.5416 | -0.0003 |
| 8 | 2 | 7 | 8 | 3 | 6 | 2223.5517 | 2223.5523 | -0.0005 |
| 7 | 2 | 6 | 7 | 3 | 5 | 2223.5604 | 2223.5599 | 0.0005  |
| 4 | 2 | 2 | 4 | 3 | 1 | 2223.5749 | 2223.5752 | -0.0004 |
| 6 | 2 | 4 | 6 | 3 | 3 | 2223.5898 | 2223.5889 | 0.0009  |
| 7 | 2 | 5 | 7 | 3 | 4 | 2223.6027 | 2223.6020 | 0.0007  |
| 4 | 1 | 3 | 5 | 2 | 4 | 2223.6288 | 2223.6286 | 0.0002  |
| 3 | 1 | 3 | 4 | 2 | 2 | 2223.6639 | 2223.6639 | -0.0000 |
| 3 | 1 | 2 | 4 | 2 | 3 | 2223.7459 | 2223.7455 | 0.0004  |
| 2 | 1 | 2 | 3 | 2 | 1 | 2223.8291 | 2223.8289 | 0.0002  |
| 2 | 1 | 1 | 3 | 2 | 2 | 2223.8688 | 2223.8688 | 0.0000  |
| 1 | 1 | 1 | 2 | 2 | 0 | 2223.9855 | 2223.9854 | 0.0001  |
| 1 | 1 | 0 | 2 | 2 | 1 | 2223.9987 | 2223.9985 | 0.0002  |
| 7 | 0 | 7 | 8 | 1 | 8 | 2224.0334 | 2224.0336 | -0.0002 |
| 7 | 1 | 7 | 7 | 2 | 6 | 2224.0942 | 2224.0932 | 0.0011  |
| 6 | 0 | 6 | 7 | 1 | 7 | 2224.1389 | 2224.1387 | 0.0002  |
| 3 | 1 | 3 | 3 | 2 | 2 | 2224.2382 | 2224.2382 | 0.0000  |
| 5 | 0 | 5 | 6 | 1 | 6 | 2224.2451 | 2224.2451 | -0.0000 |
| 2 | 1 | 1 | 2 | 2 | 0 | 2224.2956 | 2224.2955 | 0.0001  |
| 3 | 1 | 2 | 3 | 2 | 1 | 2224.3131 | 2224.3128 | 0.0003  |
| 4 | 0 | 4 | 5 | 1 | 5 | 2224.3540 | 2224.3544 | -0.0004 |
| 4 | 0 | 4 | 5 | 1 | 5 | 2224.3540 | 2224.3544 | -0.0003 |
| 5 | 1 | 4 | 5 | 2 | 3 | 2224.3580 | 2224.3581 | -0.0001 |
| 6 | 1 | 5 | 6 | 2 | 4 | 2224.3825 | 2224.3827 | -0.0002 |
| 3 | 0 | 3 | 4 | 1 | 4 | 2224.4674 | 2224.4675 | -0.0001 |
| 8 | 0 | 8 | 8 | 1 | 7 | 2224.6905 | 2224.6903 | 0.0002  |
| 1 | 0 | 1 | 2 | 1 | 2 | 2224.7095 | 2224.7095 | 0.0001  |
| 6 | 0 | 6 | 6 | 1 | 5 | 2224.8210 | 2224.8212 | -0.0001 |
| 0 | 0 | 0 | 1 | 1 | 1 | 2224.8394 | 2224.8393 | 0.0000  |
| 5 | 0 | 5 | 5 | 1 | 4 | 2224.8690 | 2224.8690 | -0.0000 |
| 4 | 1 | 4 | 5 | 0 | 5 | 2224.8991 | 2224.9003 | -0.0012 |
| 3 | 0 | 3 | 3 | 1 | 2 | 2224.9352 | 2224.9352 | -0.0000 |
| 2 | 0 | 2 | 2 | 1 | 1 | 2224.9557 | 2224.9558 | -0.0001 |
| 1 | 0 | 1 | 1 | 1 | 0 | 2224.9690 | 2224.9690 | 0.0000  |
| 2 | 1 | 2 | 3 | 0 | 3 | 2225.2215 | 2225.2214 | 0.0001  |
| 6 | 1 | 5 | 5 | 2 | 4 | 2225.2588 | 2225.2587 | 0.0000  |
| 2 | 0 | 2 | 1 | 1 | 1 | 2225.2662 | 2225.2660 | 0.0003  |
| 1 | 1 | 1 | 2 | 0 | 2 | 2225.3759 | 2225.3756 | 0.0003  |
| 1 | 1 | 0 | 1 | 0 | 1 | 2225.6728 | 2225.6729 | -0.0001 |
| 2 | 1 | 1 | 2 | 0 | 2 | 2225.6856 | 2225.6856 | -0.0000 |
| 3 | 1 | 2 | 3 | 0 | 3 | 2225.7055 | 2225.7054 | 0.0001  |
| 4 | 1 | 3 | 4 | 0 | 4 | 2225.7331 | 2225.7329 | 0.0002  |
| 5 | 0 | 5 | 4 | 1 | 4 | 2225.7378 | 2225.7377 | 0.0002  |
| 5 | 1 | 4 | 5 | 0 | 5 | 2225.7692 | 2225.7691 | 0.0001  |
| 1 | 1 | 1 | 0 | 0 | 0 | 2225.8026 | 2225.8027 | -0.0001 |
| 6 | 1 | 5 | 6 | 0 | 6 | 2225.8149 | 2225.8151 | -0.0002 |
| 7 | 1 | 6 | 7 | 0 | 7 | 2225.8723 | 2225.8721 | 0.0003  |
| 8 | 1 | 7 | 8 | 0 | 8 | 2225.9408 | 2225.9410 | -0.0001 |
| 3 | 1 | 3 | 2 | 0 | 2 | 2226.0548 | 2226.0550 | -0.0002 |
| 4 | 1 | 4 | 3 | 0 | 3 | 2226.1719 | 2226.1719 | -0.0001 |
| 5 | 1 | 5 | 4 | 0 | 4 | 2226.2834 | 2226.2836 | -0.0002 |
| 3 | 2 | 1 | 3 | 1 | 2 | 2226.3133 | 2226.3133 | 0.0000  |
| 2 | 2 | 0 | 2 | 1 | 1 | 2226.3311 | 2226.3313 | -0.0002 |
| 2 | 2 | 1 | 2 | 1 | 2 | 2226.3689 | 2226.3690 | -0.0001 |
| 4 | 2 | 3 | 4 | 1 | 4 | 2226.4122 | 2226.4123 | -0.0002 |
| 5 | 2 | 4 | 5 | 1 | 5 | 2226.4431 | 2226.4435 | -0.0005 |
| 6 | 2 | 5 | 6 | 1 | 6 | 2226.4814 | 2226.4812 | 0.0002  |
| 7 | 1 | 7 | 6 | 0 | 6 | 2226.4948 | 2226.4948 | -0.0000 |
| 2 | 2 | 1 | 1 | 1 | 0 | 2226.6286 | 2226.6285 | 0.0001  |
| 3 | 2 | 2 | 2 | 1 | 1 | 2226.7576 | 2226.7576 | 0.0000  |
| 3 | 2 | 1 | 2 | 1 | 2 | 2226.7976 | 2226.7974 | 0.0002  |
| 4 | 2 | 3 | 3 | 1 | 2 | 2226.8799 | 2226.8800 | -0.0001 |
| 4 | 2 | 2 | 3 | 1 | 3 | 2226.9614 | 2226.9613 | 0.0001  |
| 5 | 2 | 4 | 4 | 1 | 3 | 2226.9954 | 2226.9958 | -0.0005 |
| 6 | 3 | 3 | 6 | 2 | 4 | 2227.0049 | 2227.0046 | 0.0003  |
| 4 | 3 | 1 | 4 | 2 | 2 | 2227.0203 | 2227.0206 | -0.0003 |
| 6 | 2 | 5 | 5 | 1 | 4 | 2227.1052 | 2227.1051 | 0.0001  |

|       |   |   |   |   |   |           |           |         |
|-------|---|---|---|---|---|-----------|-----------|---------|
| 5     | 2 | 3 | 4 | 1 | 4 | 2227.1350 | 2227.1347 | 0.0003  |
| 7     | 2 | 6 | 6 | 1 | 5 | 2227.2072 | 2227.2079 | -0.0007 |
| 7     | 2 | 5 | 8 | 3 | 6 | 2222.4635 | 2222.4633 | 0.0002  |
| 6     | 2 | 4 | 7 | 3 | 5 | 2222.5920 | 2222.5922 | -0.0002 |
| 5     | 2 | 4 | 6 | 3 | 3 | 2222.7133 | 2222.7132 | 0.0001  |
| 2     | 2 | 0 | 1 | 1 | 1 | 2226.6417 | 2226.6415 | 0.0002  |
| ***** |   |   |   |   |   |           |           |         |
